# Supplementary material for: Transferrin receptor-targeted redox/pH-sensitive podophyllotoxin prodrug micelles for multidrug-resistant breast cancer therapy
Source: Royal Society of Chemistry journal article supplement (doi:10.1039/c9tb00651f), 2019-01-01
Supplement: c9tb00651f1.pdf [file c9tb00651f1.pdf]

# Transferrin Receptor-targeted Redox/pH-sensitive Podophyllotoxin Prodrug Micelles for Multidrug- Resistant Breast Cancer Therapy

Yongfei Li,<sup>1#</sup> Mie Chen,<sup>2#</sup> Bowen Yao,<sup>3#</sup> LUXUN,<sup>4</sup> Peng He,<sup>1</sup> Xiaoqing Zhang,<sup>1</sup>  
Xiaomei Ren,<sup>1</sup> Weihe Bian,<sup>1</sup> Chang Yao<sup>1\*</sup>

1. Department of Mastopathy, The Affiliated Hospital of Nanjing University of Chinese Medicine (Jiangsu Province Hospital of TCM), Nanjing 210029, China.

2. Department of Breast, Changzhou Tumor Hospital Affiliated to Soochow University, Changzhou 213032, China.

3. Sidney Kimmel Medical College, Thomas Jefferson University, Philadelphia, PA, 19107, USA.

4. Milken School of Public Health, George Washington University, Washington, DC, 20052, USA

**#These authors contributed to this work equally.**

**\*Corresponding author:** Chang Yao, M.D., Ph.D., Department of Mastopathy, The Affiliated Hospital of Nanjing University of Chinese Medicine (Jiangsu Province Hospital of TCM), No.155 Hanzhong Road, Nanjing, 210029, China. E-mail: yaochang67@126.com

## 1 **1 Materials**

2 Mal-PEG-NH<sub>2</sub> and mPEG-NH<sub>2</sub> (molecule weight= 2,000 Da) was purchased from  
3 JENKEM Technology Co., Ltd. (Beijing, China). N-terminus cysteine modified T7  
4 peptide (Cysteine-Histidine-Alanine-Isoleucine-Tyrosine-Proline-Arginine-Histidine,  
5 CHAIYPRH; named as Pep) was obtained from GL Biochem Peptide Ltd. (Shanghai,  
6 China). Podophyllotoxin (PPT), acetyl chloride, 3,3'-dithiodipropionic acid (DTPA),  
7 succinic anhydride (SA), 1-Ethyl-3-(3-dimethylaminopropyl) carbodiimide  
8 hydrochloride (EDC·HCl), and N-hydroxysuccinimide (NHS) were purchased from  
9 Aladdin Industrial Corporation (Shanghai, China). The docetaxel (DTX) and  
10 paclitaxel (PTX) were purchased from Energy Chemical (Shanghai, China). 3-(4,5-  
11 dimethyl-thiazol-2-yl)-2,5-diphenyl tetrazolium bromide (MTT) and 4',6-diamidino-2-  
12 phenylindole dihydrochloride (DAPI) were purchased from Beyotime Biotechnology  
13 (Shanghai, China).

## 14 **2 Cells and animals**

15 MCF-7 cells (Human breast cancer cell line) and A549 cells (Human non-small  
16 cell lung cancer cell line) were purchased from Institute of Biochemistry and Cell  
17 Biology, Shanghai Institutes for Biological Sciences, Chinese Academy of Sciences  
18 (Shanghai, China). MCF-7/ADR cells (Human breast cancer doxorubicin-resistant cell  
19 line) and A549/PTX cells (Human non-small cell lung cancer paclitaxel-resistant cell  
20 line) were obtained from KeyGEN BioTECH (Nanjing, China).

21 BALB/c nude mice (female, 4-6 weeks, 18 ± 2 g) and Kunming mice (female, 6-  
22 8 weeks) were purchased from the Vital River Laboratory Animal Technology Co., Ltd.  
23 (Beijing, China). All animals received care in compliance with the guidelines outlined  
24 in the Guide for the Care and Use of Laboratory Animals and all procedures were  
25 approved by The Jiangsu Province Hospital of TCM Care and Use Committee.

## 26 **3 Characterization**

27 <sup>1</sup>H NMR spectra were carried on a Bruker AVANCE III 300 MHz NMR  
28 spectrometer in DMSO-*d*<sub>6</sub> or D<sub>2</sub>O. PPT and PPT-prodrug were determined by high-  
29 performance liquid chromatography (HPLC, Shimadzu, LC-20A, Japan) with the

30 detector set at 292 nm using acetonitrile and water (80: 20, v/v) as a mobile phase. The  
31 nanoparticle size, polydispersity index (PDI), and surface zeta potential were  
32 investigated using dynamic light scattering (DLS; Zs90; Malvern, UK). Critical micelle  
33 concentration (CMC) was measured according to the previous method using Nile red  
34 as the fluorescent probe.<sup>1</sup>

#### 35 **4. Serum stability and hemolysis assay**

36 The stability of Pep-SS-NPs in serum was investigated by incubating micelle  
37 solution in PBS (pH 7.4) at 37 °C with or without 10% FBS. The average size of Pep-  
38 SS-NP micelle was tested at intervals using DLS.

39 The hemocompatibility of Pep-SS-NPs at different concentrations was assessed by  
40 hemolysis assay.<sup>2</sup> In brief, freshly mice blood was diluted by PBS (pH 7.4), and red  
41 blood cells (RBCs) were collected by centrifugation. After carefully washing and  
42 diluting, 2% RBC suspension was used for hemolysis study. Then, PPT prodrug micelle  
43 solution at systematically varied concentrations were added and mixed by vortex and  
44 incubated at 37 °C for 2 h. After that, the mixtures were centrifuged at 1200 rpm for 10  
45 min. The supernatant was collected and the amount of hemoglobin released was  
46 recorded on a microplate plate reader (Bio-Rad, CA, USA) at 540 nm.

47 Double-distilled water was used as positive control and PBS was used as negative  
48 control. The hemolysis ratio (HR) of RBCs was calculated according to the following  
49 formula:

50 
$$\text{Hemolysis (\%)} = (A_{\text{sample}} - A_{\text{negative}}) / (A_{\text{positive}} - A_{\text{negative}}) \times 100\%$$
, where,  $A_{\text{sample}}$   
51 is the absorbance of sample,  $A_{\text{negative}}$  is the absorbance of negative control and  $A_{\text{positive}}$   
52 is the absorbance of positive control. All hemolysis experiments were carried out in  
53 triplicate.

#### 54 **5. Maximum tolerated dose**

55 Kunming mice were divided into 10 groups (n = 10) and administered  
56 intravenously with the free PPT (5, 10, 15, 20, 30 mg/kg) or Pep-SS-NPs (20, 40, 80,  
57 120, and 160 mg/kg in PPT equivalent). Changes in body weight and survival of mice  
58 were measured every other day for 2 weeks. The maximum tolerated dose (MTD) was  
59 identified as the maximum dose of a drug that dose not induce animal death or >20%

60 body weight loss or other remarkable changes in the general appearance within the  
61 entire period of the experiments.

62

63

64

65

66

67

68

69

70

71

72

73

74

75

76

77

78

79

80

81

82

83

84

85

86

87

88 **Supplementary Figures**

89

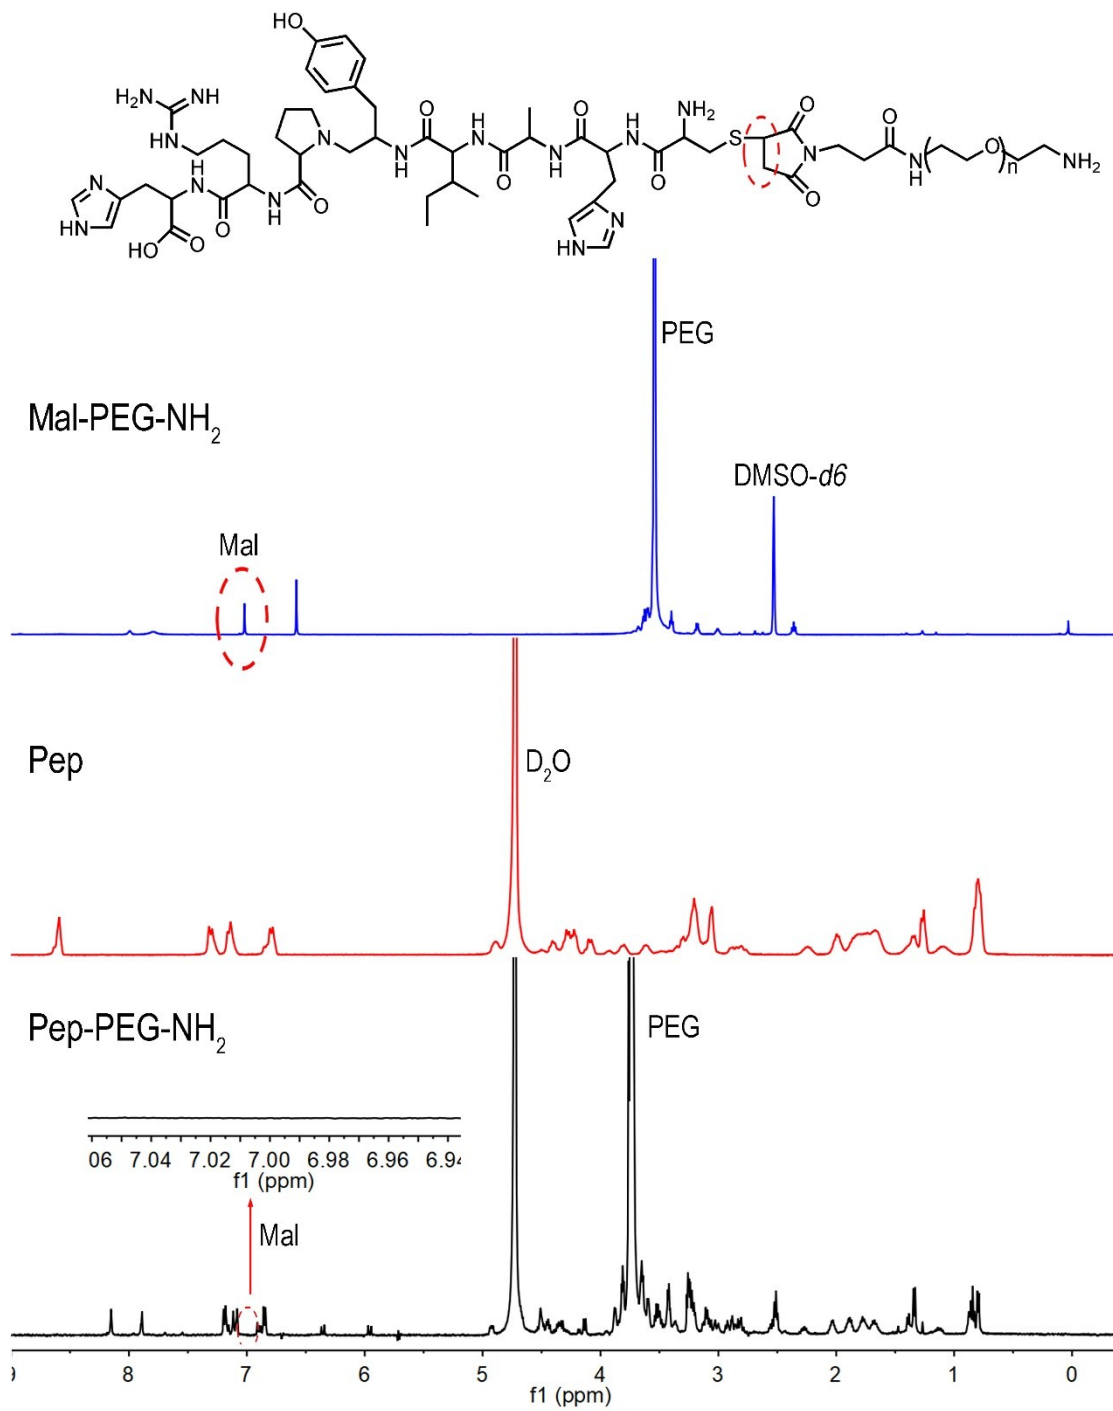

90

91 **Fig. S1**  $^1\text{H}$  NMR spectrum of Mal-PEG-NH<sub>2</sub> and Pep-PEG-NH<sub>2</sub> in D<sub>2</sub>O.

92

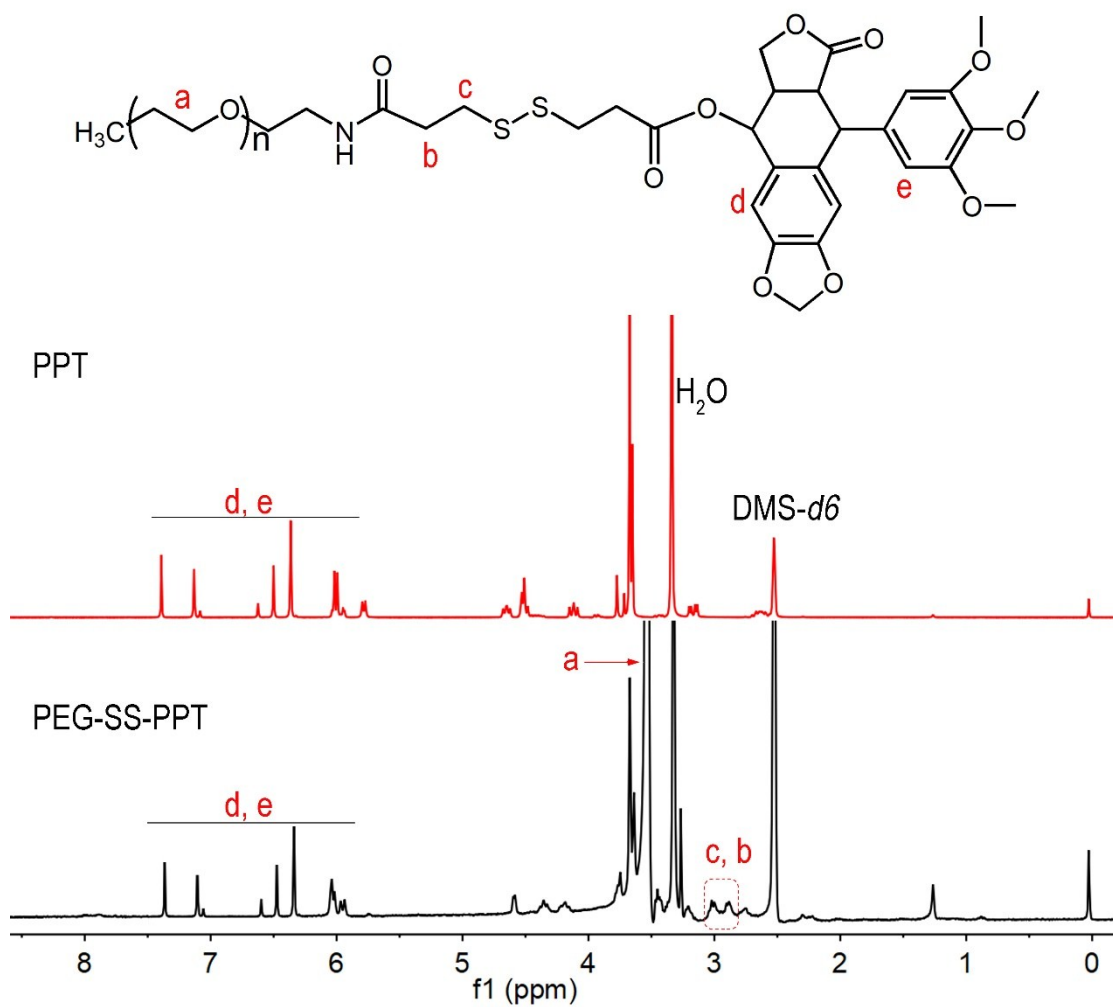

93

94 **Fig. S2** <sup>1</sup>H NMR spectrum of PPT and PEG-SS-PPT in DMSO-*d*<sub>6</sub>.

95

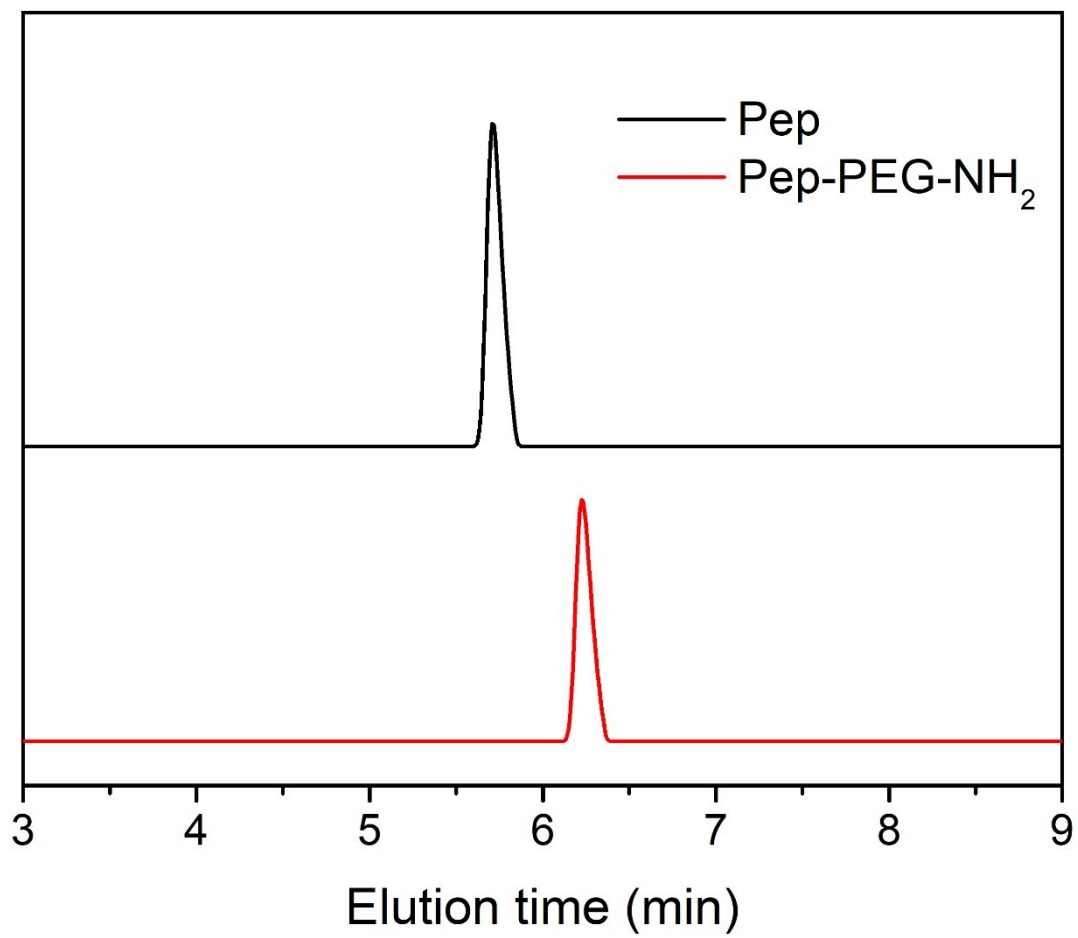

96

97 **Fig. S3** HPLC spectrum of Pep and Pep-PEG-NH<sub>2</sub>.

98

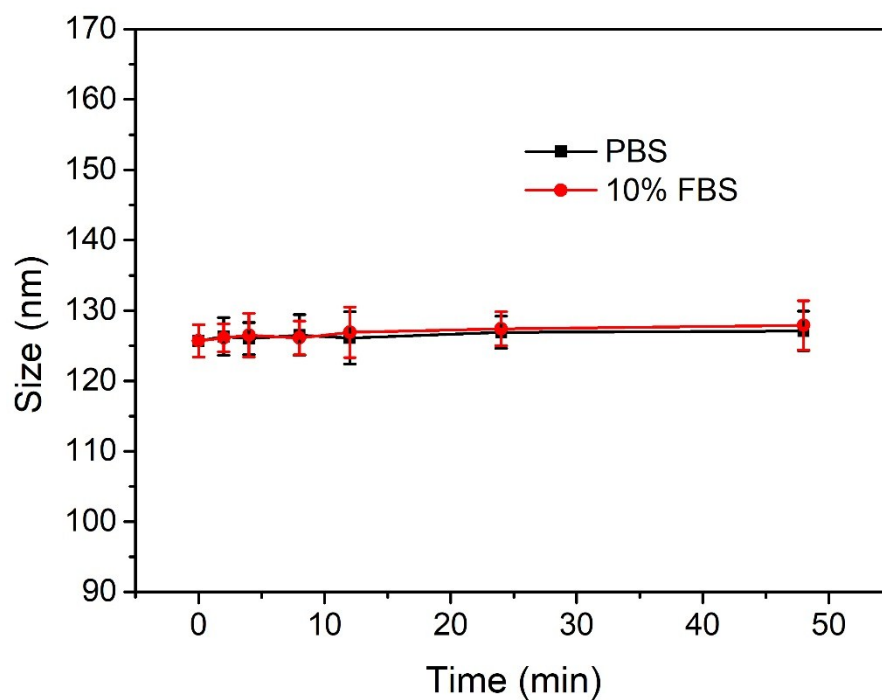

99  
 100 **Fig. S4** Size changes of Pep-SS-NPs in pH 7.4 with or without 10% FBS, data shown as mean  $\pm$   
 101 SD,  $n = 3$ .  
 102  
 103

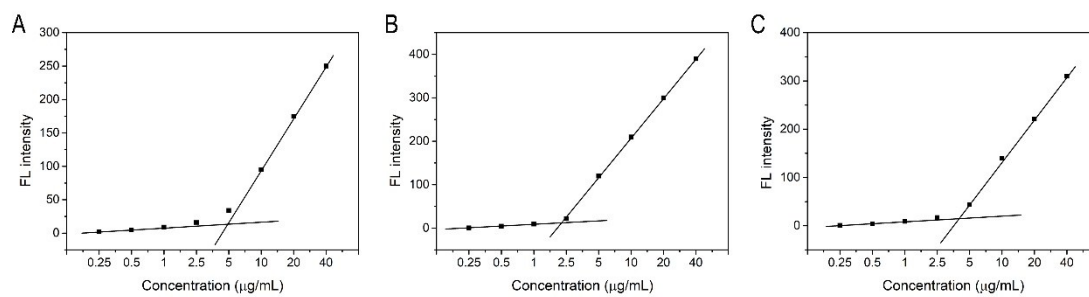

104  
 105 **Fig. S5** CMC of Pep-SS-NPs (A), SS-NPs (B), and CC-NPs (C).



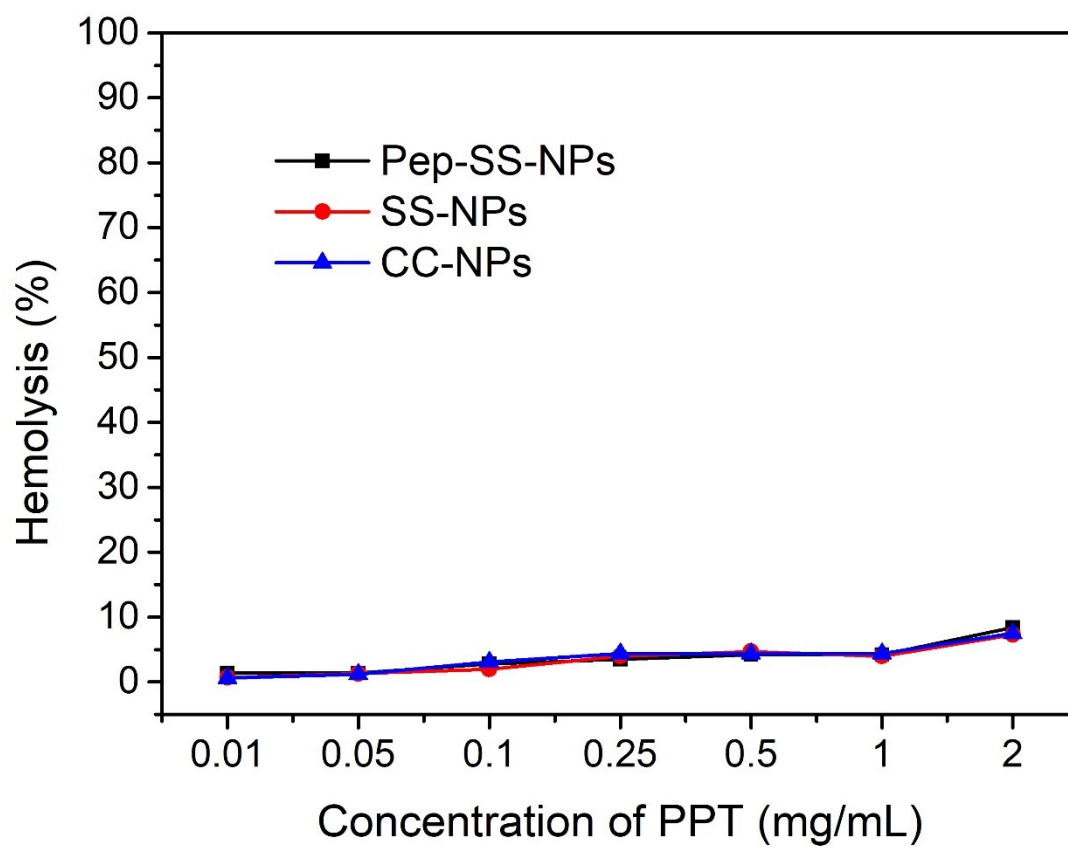

106

107 **Fig. S6** Hemolysis rates of Pep-SS-NPs, SS-NPs, and CC-NPs at the range of 0.1 to 2.0 mg/mL of

108 PPT. Data presented as mean  $\pm$  SD,  $n = 3$ .

109

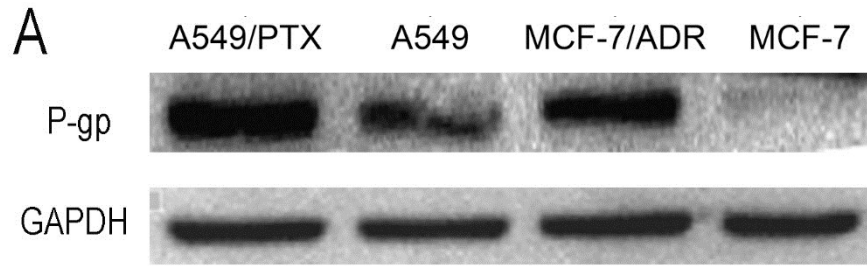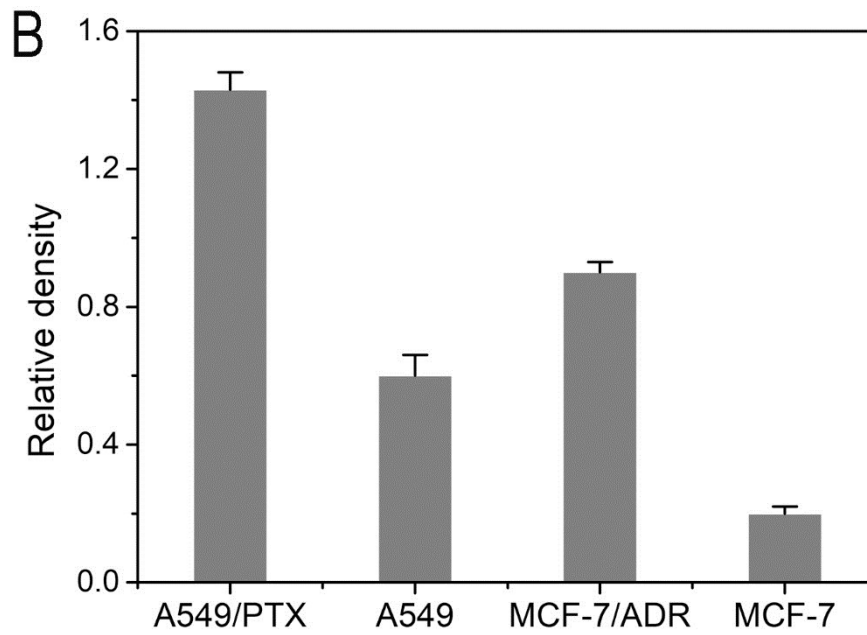

110

111 **Fig. S7** Western P-gp expression in A549/PTX, A549, MCF-7/ADR, and MCF-7 cells determined

112 by western blotting using GAPDH as an internal control.

113

114

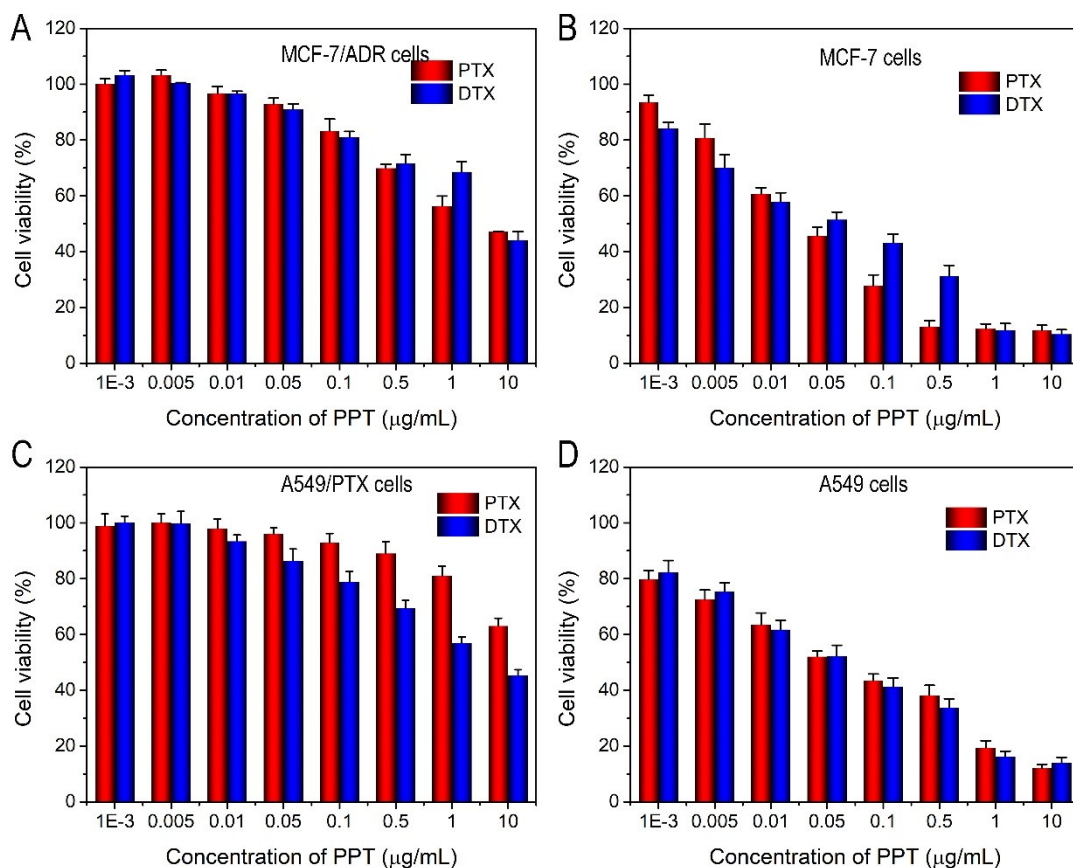

115

116 **Fig. S8** Cytotoxicity analysis of PTX and DTX on MCF-7/ADR cells (A), MCF-7 cells (B),  
 117 A549/PTX cells (C), and A549 cells (D) for 48 h by MTT assay. Data shown as mean  $\pm$  SD,  $n = 6$ .

118

119

120

121

122

123

124

## 125 **References**

- 126 1. K. Cai, X. He, Z. Song, Q. Yin, Y. Zhang, F. M. Uckun, C. Jiang and J. Cheng,  
 127 *Journal of the American Chemical Society*, 2015, **137**, 3458-3461.
- 128 2. J. Zhu, Q. Huo, M. Xu, F. Yang, Y. Li, H. Shi, Y. Niu and Y. Liu, *Nanoscale*,  
 129 2018, **10**, 10.1039.C1038NR03899F-.

130
